# Supplementary material for: Biomarkers of cardiovascular injury and stress are associated with increased frequency of ventricular ectopy: a population-based study
Source: BMC Cardiovasc Disord. 2016 Nov 22;16:233. doi: 10.1186/s12872-016-0407-z (PMC5118891; doi:10.1186/s12872-016-0407-z)
Supplement: Additional file 1: — Data set. (XLSX 60 kb) [file 12872_2016_407_MOESM1_ESM.xlsx]

## Sheet: Sheet1
>5VES/H	CVE	Gender (1=male)	Age	Curr smoking	Hx CHD	Hx HT	Hx DIA	GFR	Chol:HDL ratio	SBP	BMI	LVH	AHI	cTnI	CRP	NTproBNP
1	1	1	50	0	0	0	0	150.61	5	133.5	31.6318	0	25.6	4	2.27	58.2402
1	0	1	55	0	0	0	0	100.141	4.3125	140.5	25.7821	0	7	1.2	1.57	26.7149
1	1	1	50	1	0	0	0	179.813	3.15385	122.5	34.9691	0	57.4	1.2	1.14	10.6516
1	1	1	60	0	1	1	0	125.722	3.4	132	41.1205	0	2.4	3.4	0.97	221.45
1	1	1	40	0	0	0	0	189.824	3.92857	132	30.5079	0	10.4	1.2	0.79	49.1348
1	1	1	60	0	0	0	0	128.065	2.73684	162	29.7762	1	6.3	12.4	1.44	41.4897
1	1	0	60	0	1	1	0	89.9525	3.61538	141.5	30.0731	0	7	9.3	0.71	344.974
1	0	0	65	0	0	1	0	62.8699	3.89474	138	25.3661	1	11	20.7	2.43	51.6259
1	1	1	55	0	0	1	0	185.339	4.64286	145	36.5975	1	90.7	3	9.27	139.931
1	1	1	60	1	1	1	0	112.101	7	144.5	29.1541	0	12.5	4.2	1.73	52.5708
1	1	1	65	0	0	0	0	86.7331	6.07692	143.5	30.1997	0	3.3	3.4	2.78	33.7587
1	0	1	60	0	0	1	0	117.417	4.81818	128	33.975	0	54.5	5.4	1.03	17.2659
1	0	1	60	0	1	1	0	152.52	5.6	138.5	32.066	0	57.4	21.2	1.93	230.813
1	1	1	65	0	1	1	0	115.572	6	153.5	31.4801	0	19	8.2	1.17	406.908
1	0	1	55	0	1	1	0	104.55	4.55556	123.5	25.1133	0	7	1.2	0.95	89.5937
1	1	1	60	0	1	1	0	132.116	2.64286	124	27.7457	0	32.6	5.6	0.76	353.994
1	0	1	65	0	0	1	0	86.6561	3.93333	144	28.2805	0	9.5	1.8	0.42	16.2351
1	1	0	60	0	0	0	0	123.432	3.61538	116	37.74	0	49.7	3	3.93	139.072
1	1	0	65	0	1	1	0	72.0353	3.33333	147.5	25.1562	0	38.9	2.7	3.38	214.235
1	1	1	60	0	0	1	1	144.648	3.26316	151.5	34.1441	0	79.6	5.2	3.24	11.2529
1	1	1	60		1	1	0	96.6109	4.7	138.5	29.0245	0	46.1	5.9	7.55	145.686
1	0	0	50	0	0	0	0	93.7766	2.27778	112	21.0039	0	10.8	1.2	0.33	31.1817
1	0	0	65	0	0	1	0	124.192	3.73333	114	40.7748	0	66	3.7	6.33	375.039
1	1	0	60	1	0	0	0	95.1212	5.33333	143	25.5643	0	2.2	2.6	3.47	366.965
1	1	1	40	1	0	0	0	148.479	7.42857	119	25.5664	0	9.6	1.2	1.64	56.6081
1	1	1	65	1	0	0	0	76.3159	4.21429	115.5	26.0242	0	60.6	5	0.64	23.6225
1	0	1	60	0	0	0	1	64.1608	3.53333	150.5	21.9041	0	2.4	5.6	0.22	15.3761
1	0	0	55	1	0	0	0	105.928	4.57143	110.5	25.4047	0	2.6	1.4	0.81	97.6683
1	1	0	40	0	0	0	0	106.364	1.84211	111.5	22.3977	0	6.9	1.2	0.87	149.036
1	1	1	60	1	1	1	0	114.411	2.77778	147	21.1259	0	40.6	9.1	1.04	1030.8
1	1	0	65	0	0	0	0	122.592	4.63636	160	29.5139	1	35	2.7	0.65	61.1608
1	0	1	60	1	0	1	0	104.802	3.05882	148	28.5382	0	23.4	2.4	2.14	186.317
1	1	0	40	1	0	0	0	139.783	6.3	131.5	29.6645	0	6.4	1.2	1.04	105.313
1	0	0	60	0	0	0	0	93.4613	3.26316	113.5	23.3218	0	3.8	1.2	0.33	63.2224
1	0	1	45	1	0	0	0	141.388	5.7	132.5	30.4148	0	8.9	1.3	0.55	78.8562
1	0	0	45	0	0	0	0	139.292	6.8	140.5	31.0593	0	0.6	1.9	0.52	28.0893
1	0	0	55	0	0	0	0	115.695	2.875	114.5	27.9064	0	4.3	1.5	0.64	8.9336
1	0	1	55	0	1	1	1	109.326	5.75	141	28.5639	0	10.4	2.9	0.3	72.5855
1	0	0	60	1	1	1	0	116.951	5.7	148	25.5078	1	16.9	5.1	1	729.119
1	0	1	65	0	0	0	1	87.323	3.06667	157.5	23.7702	0	18.4	2	0.42	50.681
1	0	1	40	0	0	1	1	172.354	5.1	141	30.7928	0	49.3	2	1.01	12.885
1	1	1	65	0	1	1	1	165.681	2.92308	159.5	37.7888	0	47.4	12.9	1.71	1240.4
1	0	0	55		0	1	0	110.43	3.27778	179	26.1442	0	12.3	4.5	2.73	114.591
1	0	1	60	0	0	1	1	102.895	3.75	118	29.0341	0	28.4	13.4	7.51	95.1772
1	0	0	30	0	0	0	0	175.413	4.41667	119.5	28.8879	0	1.2	1.2	0.58	50.1656
0	0	0	40	0	0	0	0	130.969	2.78571	132.5	27.2911	0	15.2	1.2	0.77	96.8093
0	0	1	55	0	0	0	0	100.303	8	173.5	31.906	0	52.6	119.5	2.93	39.4281
0	1	1	60	0	1	1	0	94.8125	4.83333	143.5	28.8693	0	23.1	5	1.29	63.0506
1	1	1	65	0	0	1	0	107.625	4.61538	139.5	33.1186	0	27.4	3.9	4	1056.57
0	0	0	55	0	0	1	0	97.7678	4.46667	152	29.7958	0	28.7	2	3.3	186.403
0	1	0	40	0	0	0	0	123.29	4.73333	141	26.26	0	1.8	1.3	0.8	15.8056
0	0	0	45	0	0	0	0	121.233	4.3125	115.5	33.2167	0	6	1.2	0.47	51.0246
0	0	1	65	0	0	1	0	69.6155	3.65	154	23.685	0	9.3	6.2	0.81	87.3603
0	0	1	65	0	0	1	0	129.033	3.78571	177	35.6728	0	24.8	6.3	0.56	73.015
0	0	1	40	0	0	0	0	105.342	7.375	141	27.0571	0	1.3	3.6	0.67	41.5756
0	0	1	60		1	1	0	131.37	4.4	123.5	32.555	0	6.6	2.3	1.08	49.5643
0	0	1	35	0	0	0	0	175.346	5.44444	140.5	34.0329	0	9	1.7	0.4	33.3292
0	0	1	30	1	0	0	0	96.4558	3.25	139.5	19.6042	0	4.4	1.9	0.17	28.1752
0	1	0	65	0	0	0	0	58.305	3.09524	159.5	22.7581	0	6	3.9	0.83	345.919
0	0	1	55	0	1	0	0	97.1075	10.6	149	36.62	0	58.5	75.4	2.37	1554.79
0	1	0	65	0	0	0	1	184.08	6.875	134.5	49.8273	0	52.5	1.9	11.39	61.5044
0	1	1	50	0	0	0	0	155.501	5.16667	144.5	38.1117	0	4.7	1.2	3.47	23.8802
0	0	1	40	0	0	0	0	117.181	5.4	174	28.9637	0	32.7	1.4	1.28	25.6841
0	0	1	60	0	1	1	0	98.28	3.90909	122	23.7498	0	15.1	4.1	5.15	255.638
0	0	1	60	0	0	1	0	75.932	3.71429	132.5	29.259	0	8.6	2.5	2.18	73.015
0	0	0	65	0	0	1	0	71.2094	2.82609	151.5	26.2915	0	0.2	3.2	0.67	92.772
0	0	0	35	0	0	0	0	128.093	2	104	27.5433	0	1.8	1.9	0.38	56.0068
0	0	1	65	0	0	0	0	106.699	5.33333	123.5	28.9184	0	15.6	6	0.87	150.84
0	1	0	55	0	0	0	0	152.096	4.09091	200	46.4149	0	13	5.4	9.7	118.542
0	1	1	65	0	0	1	0	102.162	6.07692	161	32.8188	0	57.6	4.8	1.67	122.322
0	0	1	65	1	0	1	1	109.35	3.73333	133	29.4413	0	1.4	4.3	0.82	133.575
0	0	1	55	1	0	1	1	85.255	4.45455	124	29.5933	0	6.7	8.6	9.7	39.9435
0	0	0	65	0	0	0	0	62.4	2.90909	171	22.0495	0	12.5	2	0.42	113.044
0	1	0	65	0	0	0	0	78.1164	2.57143	134.5	24.3504	0	2.1	2.7	0.31	33.6728
0	0	1	65	0	0	0	0	97.9792	6.81818	121.5	27.2063	0	14.3	15.5	1.33	26.9726
0	0	1	35	1	0	0	1	178.627	6.66667	137	28.817	0	22.6	1.9	0.52	25.6841
0	1	0	60	0	0	1	0	95.9771	3.88889	185	24.9219	0	3.7	2.1	0.62	72.8432
0	0	1	45	0	0	0	0	88.027	5.4	154.5	29.3839	0	4.8	2.7	0.64	29.9791
0	0	1	55	0	0	1	1	162.194	4.66667	133.5	36.1921	0	40.7	6.5	1.98	43.3795
0	0	1	45	0	0	0	0	98.419	4	131.5	23.8457	0	4.7	1.2	0.44	31.3535
0	0	0	65	0	0	1	1	92.8087	4	161.5	33.2653	0	45.4	2.4	3.14	40.8025
0	0	0	60	0	0	0	0	98.3273	3.85714	115.5	28.2719	0	2.2	1.6	1.03	100.933
0	0	1	30	0	0	0	0	137.009	4.07692	131.5	30.8456	0	3.3	1.2	1.79	5.11926
0	0	1	60	0	1	1	1	122.883	4.09091	100.5	31.1872	0	17.7	3.9	1.1	281.494
0	1	1	65	0	1	1	0	77.0412	3.45454	173.5	31.371	0	9.9	9.9	1.26	467.554
0	0	1	65	0	0	1	0	117.029	5.2	147.5	32.6492	0	39.8	5.6	1.17	71.4688
0	0	0	30	0	0	0	0	92.5006	2.66667	120	21.2769	0	0	1.2	0.15	31.9548
0	0	1	65	0	0	1	0	100.852	5.17647	152	26.2063	0	0.9	5.3	9.52	71.2111
0	0	1	55	1	1	1	0	129.551	4.23077	116.5	27.7279	0	28.8	2.3	0.3	71.6406
0	0	1	45	0	0	1	0	153.264	7.22222	152.5	37.9961	0	69.4	2.3	1.33	26.1995
0	0	0	65	0	0	0	1	94.3479	5.54545	160	36.1908	0	2.7	1.9	4.35	63.9955
0	0	1	55	1	1	1	0	117.418	3.42857	128.5	24.8196	0	3.2	2.6	2.29	86.5872
0	0	1	60	1	0	1	1	125.684	2.28571	138	33.308	0	20.6	1.2	1.43	57.7248
0	0	1	40	0	0	0	0	153.957	4.18182	119	31.5523	0	0.7	1.2	1.65	16.7505
0	0	1	60	0	0	0	0	95.5254	3.5	141.5	29.9667	0	33.6	3.8	3.1	14.603
0	0	1	35	0	0	0	0	118.388	4.1875	153.5	27.1556	0	0.8	25.1	0.32	20.9596
0	0	0	60	1	0	1	1	74.4363	2.95	130	25.9831	0	6.2	1.4	3.91	30.7522
0	0	1	55	0	0	0	0	98.8707	4.64286	121	23.4592	0	13.8	2.7	0.78	17.3518
0	1	0	65	0	0	0	0	63.1378	2.95652	204	19.6714	0	6.7	21.7	0.69	311.387
0	0	0	40	1	0	0	0	125.46	2.94118	130.5	23.9599	0	7.1	1.2	0.29	40.5448
0	0	1	50	0	1	1	0	134.745	3.41667	153.5	32.1991	0	15.5	3.6	2.04	13.3145
0	0	1	30	1	0	0	1	177.945	6.625	128	31.3325	0	19.3	1.2	6.4	32.8138
0	0	0	60	0	0	1	0	59.4603	2.38889	132.5	21.8008	0	49.7	3.9	1.54	33.8446
0	0	0	65	0	0	1	1	122.474	#NULL!	162	32.4793	1	4.7	27.2	3.97	115.192
0	0	0	50	0	0	0	0	157.308	2.625	153	35.8863	0	12.3	2	4.09	23.7943
0	0	1	45	1	0	0	1	146.229	8.4	135.5	30.1339	0	24.1	1.2	1.1	17.5236
0	0	0	55	0	0	1	1	161.559	2.71429	120.5	43.7249	0	6	1.7	11.63	65.4558
0	1	0	60	0	0	1	0	121.644	3.95	151.5	28.4652	0	8.3	1.6	1.26	46.6437
0	0	0	40	0	0	0	0	120.676	2.33333	116.5	23.9018	0	10.8	1.2	1.58	66.8302
0	0	0	60	1	0	1	1	127.104	3.1875	187.5	35.9058	0	5.7	1.2	6.21	87.4462
0	1	1	65	0	0	0	0	99.63	6.42857	137	30.5032	0	36	4.5	1.11	159.946
0	0	1	60	0	0	1	0	81.8656	5	152	31.1194	1	35	2.6	1.87	73.9599
0	0	0	50	0	0	0	0	96.7703	3.625	189	23.5445	1	0.2	1.2	0.23	65.5417
0	0	0	30	0	0	0	0	163.919	2.625	102.5	35.5795	0	1.3	1.2	5.45	118.112
0	0	1	60	0	1	1	0	81.9006	4.30769	149	23.8948	0	3	8.6	0.98	308.037
0	1	0	40	0	0	0	0	91.3813	3	128	22.2497	0	0.7	1.2	0.72	107.031
0	0	1	45	0	1	1	1	135.683	4.55556	156.5	30.5308	0	0.5	6.6	8.36	350.214
0	0	1	65	0	0	0	0	130.188	6.1	159.5	31.9772	0	3.1	2.3	0.84	19.8429
0	0	0	65		0	0	0	100.862	5.15385	136.5	27.8173	0	2.1	1.5	0.94	31.0099
0	1	1	45	1	0	0	0	140.22	2.69231	147	24.9384	0	30	3.9	3.21	47.245
0	0	1	60	0	1	1	0	103.739	4.9	136.5	31.4541	0	17	1.4	1.33	61.9339
0	0	0	40	0	0	0	0	213.85	3.25	138.5	35.818	0	1.1	1.2	7.89	29.0342
0	0	1	45	0	1	1	0	110.418	5.22222	160.5	30.324	0	0.9	8	0.7	201.35
0	0	0	50	0	0	0	0	87.6	4.5	116.5	24.6182	0	16	1.2	0.74	57.1235
0	0	1	50	0	1	0	0	121.283	4.53846	126.5	31.1164	0	56.9	1.8	0.44	14.4312
0	0	0	60	0	0	0	0	80.1625	2.28571	158	20.7828	0	9.4	1.6	0.39	149.208
0	0	1	65	0	0	0	0	68.4592	3.35294	147.5	23.7751	0	17.3	3.5	1.01	51.0246
0	0	1	45	0	0	0	0	169.906	4.6875	140.5	37.2318	0	70.8	3.3	3.27	20.7878
0	1	0	50	0	0	0	0	109.937	2.81818	174.5	24.9529	0	0	1.3	0.71	82.6358
0	0	1	65	0	0	0	0	73.7146	3.8125	127.5	26.6358	0	12.3	3.5	2.49	54.7183
0	1	0	55	0	0	0	0	128.792	5.21429	141	33.6732	0	32.9	1.4	3.07	60.6454
0	0	0	65	0	0	1	0	51.2442	3.375	152	20.4298	0	1.3	6.1	0.91	209.768
0	0	0	65	0	0	1	0	118.04	2.28	141.5	23.564	0	55.9	2.7	4.94	159.946
0	0	1	60	1	0	1	0	84.5821	4.77778	136	25.5305	0	32.2	5.1	3.93	334.151
0	0	1	50	0	0	0	0	95.4954	4.84615	137	25.2181	0	12.8	1.2	0.87	8.00588
0	0	0	50	0	0	1	1	132.492	2.35294	151.5	28.9163	0	4	1.2	5.44	37.1947
0	0	1	50	0	1	1	1	151.936	4.88889	140	38.5352	0	31.3	4.8	3.09	94.9195
0	1	1	55	0	1	1	0	163.795	4.2	164	30.4324	0	7	3	0.42	162.78
0	0	1	55	0	0	0	0	126.186	5.81818	145.5	27.4888	0	39	1.2	2.05	34.8754
0	0	0	60	0	0	0	0	104.99	2.69565	170	27.5087	0	2.4	1.7	1.46	103.595
0	0	0	60	1	0	0	0	115.256	3.22727	132	37.639	0	3.2	1.2	5.29	57.9825
0	0	0	50	1	0	0	0	91.52	2.81818	107.5	24.7074	0	10.2	1.2	0.51	56.6081
0	0	0	30	1	0	0	0	133.182	2.9375	112	33.4954	0	2.5	1.6	2.72	46.386
0	0	0	55	0	0	0	0	117.031	3.07692	144.5	31.8047	0	22	1.2	1.44	68.3764
0	0	0	30	1	0	0	0	151.822	4.21429	132.5	28.2784	0	1.6	1.2	2.85	17.3518
0	0	0	65	1	0	1	0	106.645	3.15789	128.5	27.897	0	7.1	4.2	0.55	38.8268
0	0	1	60	0	1	1	1	118.637	4	156.5	39.4444	0	73.3	5.1	0.46	58.9274
0	0	1	55	0	0	0	0	174.199	6.85714	139	29.7047	0	16.3	3.2	3.11	27.3162
0	0	0	65	0	0	1	1	117.853	4.41667	171	36.9834	0	62.4	1.2	2.27	16.5787
0	0	1	45	1	1	1	0	214.635	3.88889	120	44.4087	0	104	2.3	0.41	37.9678
0	0	0	55	1	0	0	0	162.716	5.23077	118	42.7418	0	11.8	1.9	1.81	19.1557
0	0	1	55	0	1	1	1	132.225	3.44444	155	32.9589	0	48.5	2.7	3.14	26.4572
0	0	0	60	0	0	1	1	94.1943	6	143	26.1189	0	3.6	1.2	1.27	16.5787
0	0	1	50	0	0	0	0	140.054	5.4	181	34.0683	0	9.8	3.5	0.82	5.07863
0	0	1	65	0	0	1	0	92.619	3.90909	144.5	33.7408	0	12	2.6	0.37	24.2238
0	0	0	35	0	0	0	0	131.495	2.8125	117	31.6154	0	0	1.2	0.26	54.5465
0	0	0	45	0	0	0	0	144.907	4.30769	159.5	32.1233	0	0.5	1.2	2.25	36.2498
0	0	0	60	0	0	1	0	88.0045	2.82353	115.5	25.6231	0	1.5	3	0.71	103.08
0	0	0	30	0	0	0	0	119.197	2.45	130	24.4338	0	17.9	1.2	1.27	67.002
0	0	1	55	0	0	0	0	91.4813	5.07143	124	24.7034	0	30.9	1.7	0.9	109.952
0	0	1	60	0	0	1	0	130.162	3.84615	138.5	31.8625	1	22.2	3.9	1.15	26.4572
0	0	1	45	0	0	0	0	89.9745	4.23529	176.5	24.6893	0	0.7	2.3	0.88	5.07863
0	0	1	55	1	1	1	1	176.591	4.4	113	33.6252	0	35	1.2	1.85	5.07863
0	0	1	45	0	0	1	0	98.0478	3.4375	121.5	27.5011	0	10.2	2.2	0.74	15.1184
0	0	1	45	0	0	1	0	227.758	5.7	150	35.3758	0	44	1.2	1.12	32.3843
0	0	1	65	0	0	1	0	73.526	3.4	142.5	26.1064	0	6.7	4.3	0.92	157.369
0	0	1	30	0	0	0	0	123.194	2.9	137.5	20.8454	0	2.3	1.2	0.56	20.8737
0	0	1	60	0	0	1	0	120.197	6.27273	140	31.2241	0	26.1	7.8	0.88	20.4442
0	0	0	50		0	0	0	89.6589	2.86364	148.5	24.4938	0	0.1	1.2	0.08	67.1738
0	0	1	50	0	1	1	0	122.477	4.3	129	30.2888	0	49.4	3.1	0.41	54.8901
0	0	1	65	0	0	0	0	82.2967	4.76923	153	25.0248	0	12.9	2.2	3.55	34.9613
0	0	0	40	1	0	1	0	209.087	2.8125	142.5	44.2361	0	8.9	1.2	19.01	22.6776
0	0	0	40	1	0	0	0	144.19	5.15385	120	32.4379	0	7.7	1.2	1.27	27.8316
0	0	1	55	0	0	0	0	86.3381	6	120	23.2366	0	9.6	1.6	5.4	19.3275
0	0	0	45	0	0	0	0	147.847	4.38462	104	25.893	0	0.8	1.2	2.46	21.7327
0	0	0	45	1	0	0	0	204.25	4.81818	115.5	37.0663	0	4.7	1.2	3.77	99.0427
0	1	0	60	0	0	0	0	81.2295	4.42857	140.5	27.7228	0	15.9	1.6	0.83	87.1885
0	0	1	55	0	0	1	0	140.228	3.92308	148	34.2107	0	9.8	1.2	1.58	51.4541
0	0	1	45	0	0	0	0	186.049	4.5	184.5	33.3268	0	15.5	3.7	1.03	34.5318
0	0	1	60	0	0	1	0	97.2944	4	162.5	28.7347	0	2.7	1.5	0.72	49.4784
0	0	0	30		0	0	0	98.3177	3	100.5	20.3989	0	0	1.2	0.18	110.725
0	0	0	35	0	0	0	0	120.685	3.13333	117.5	22.4964	0	0.1	1.3	0.46	41.3179
0	1	0	50	1	0	0	0	107.856	3.92308	139	26.3179	0	6.3	1.2	0.99	75.7638
0	0	1	60	1	1	1	0	99.039	3.77778	104	23.9198	0	15	3.4	1.15	33.4151
0	0	0	45	1	0	0	1	177.377	5.88889	151.5	40.1346	0	22	1.9	9.49	15.462
0	0	1	60	0	0	0	0	75.7924	5.38462	138.5	30.0195	0	1.8	1.6	3.68	87.4462
0	0	0	60	1	0	1	0	100.722	2.90909	141	32.79	0	0.3	3.2	1.82	197.398
0	0	1	55	0	0	0	0	116.139	5.5	173.5	26.5362	0	0.5	1.2	2.77	13.8299
0	0	1	35	0	0	0	0	145.653	3.71429	139	30.4081	0	1.1	1.9	0.83	10.8234
0	0	0	30	0	0	0	0	117.596	3.33333	111.5	22.2111	0	0	1.2	1.7	175.064
0	0	0	45	1	0	0	0	157.239	4.21429	128.5	25.196	0	1.1	1.2	0.17	22.334
0	0	0	50	0	0	1	0	138.972	6	147	32.0596	0	2.6	1.2	2.94	11.6824
0	0	0	30	0	0	0	0	155.891	2.75	111.5	33.1325	0	0.7	2.8	9.13	185.544
0	0	0	45	0	0	0	0	104.022	3.33333	115	25.412	0	2.2	1.2	0.22	59.4428
0	0	0	55	0	0	0	0	79.6691	3.86667	155	34.3406	0	3.7	1.2	5.19	84.7833
0	0	0	50	0	0	0	0	99.8967	3.6	117.5	21.6134	0	2.9	1.2	0.22	27.7457
0	0	0	45	0	0	0	0	91.65	4.66667	112.5	24.2801	0	6	1.2	0.4	43.9808
0	0	0	40	0	0	0	0	217.079	5.63636	115	41.3641	0	8.9	1.2	3.08	71.7265
0	0	1	40	0	0	0	0	186.461	4.4	132.5	32.9764	0	58.9	2.4	0.89	229.267
0	0	0	45	1	0	0	0	117.374	2.75	109.5	22.0313	0	0	1.2	0.69	121.033
0	0	1	55	0	0	0	0	98.4212	2.9	129	24.0859	0	3.6	2.4	1.53	40.9743
0	0	1	65	0	0	1	0	75.7946	3.625	169.5	21.2124	0	0	3.4	0.43	76.6228
0	0	1	30	0	0	0	0	222.614	5.66667	147.5	37.254	0	11.6	1.2	2.27	8.6759
0	0	0	50	1	0	1	0	136.121	4.57143	129.5	34.6923	0	17.6	1.2	1.64	50.9387
0	0	1	60		0	0	0	124.378	3.15789	155	31.4927	0	12.4	1.4	3.05	45.527
0	0	0	40	1	0	1	0	131.733	3	127.5	26.8634	0	0.8	1.2	0.43	96.8952
0	0	1	30	0	0	0	0	156.948	4.45455	133.5	25.86	0	1.7	1.2	0.69	16.8364
0	0	0	50	1	0	0	0	85.3412	4.2	133.5	22.4996	0	3	1.2	1.09	307.007
0	0	1	50	0	0	1	0	111.221	4.61538	167	28.6003	0	4.7	8.5	0.92	37.8819
0	0	1	60	0	0	0	0	87.4667	3.26316	131.5	24.5548	0	4.8	1.2	0.26	7.00085
0	0	0	30	0	0	0	0	129.707	3.06667	110.5	30.0032	0	0.2	1.2	1.04	55.2337
0	0	0	35	0	0	0	0	171.026	3.76923	116	37.0689	0	1.5	1.2	4.97	6.82905
0	0	1	55	1	1	1	0	112.2	4.16667	154	27.4955	0	48.6	5.2	3.11	104.197
0	0	1	40	0	0	0	0	128.001	6.55556	134	30.6765	0	17.1	1.2	1.55	14.2594
0	0	1	45	1	0	0	0	130.626	4.66667	153	29.8883	0	56.2	2.7	0.28	7.72241
0	0	1	55	0	0	0	0	102.433	5.75	144.5	26.3156	0	0.9	1.2	1.46	35.6485
0	0	1	50	0	0	0	0	112.677	4	130.5	26.0118	0	25.6	1.2	17.15	30.2368
0	0	1	55	0	0	1	0	140.812	5.15385	152.5	31.4614	0	7.1	4.8	1.48	43.5513
0	0	0	65	0	0	1	0	99.0716	3.65217	147.5	34.5247	0	24.1	3.7	3.17	186.145
0	0	1	50	1	1	1	0	138.118	4.4	120.5	30.4559	0	3.1	2.9	0.4	411.719
0	0	1	35	0	0	0	0	179.748	3.61111	131	27.821	0	2	1.2	0.78	23.4507
0	0	1	35	1	0	0	0	119.385	3.4375	125.5	25.094	0	38.7	1.2	4.57	9.7926
0	0	1	45	0	1	1	0	132.286	4.88889	135.5	29.204	0	11.8	1.2	0.51	8.45256
0	0	1	60	0	1	1	0	140.052	2.92857	142.5	30.2597	0	5.3	1.2	2.39	25.77
0	0	1	30		0	0	0	160.609	5.7	137.5	29.6414	0	0.6	2.2	2.73	32.8138
0	0	1	35	0	0	0	0	120.917	3.8125	128.5	25.4953	0	0.4	1.2	0.41	9.6208
0	0	1	65	0	0	1	1	76.383	5	144.5	26.7608	0	2.1	4.3	1.08	58.2402
0	0	1	55	0	0	1	1	147.677	5.4	130	33.0044	0	53.5	3.9	1.99	11.3388
0	0	1	45	0	0	0	0	161.337	5	153	33.6296	0	15.2	1.9	2.3	26.3713
0	0	0	50	0	0	1	0	64.545	3.07143	130.5	27.9136	0	6.4	1.2	1.48	22.5917
0	0	0	65	0	0	0	0	74.6571	3.7	176	27.0707	0	27.4	12.2	1.5	38.3973
0	0	0	40	0	0	0	0	143.213	2.94118	116	30.7421	0	2.9	1.2	1.44	91.4835
0	0	1	35	0	0	0	0	144.124	5.45455	135	23.8183	0	0.1	2	0.46	29.8932
0	0	0	35	1	0	0	0	114.897	3.33333	123	24.2294	0	5.9	6.5	0.45	71.4688
0	0	0	35	0	0	0	0	94.1436	3.33333	104	21.7617	0	1.3	1.2	1.17	82.2922
0	0	1	55	0	0	1	0	108.813	3.92308	156	36.3202	0	17.5	2	2.11	166.904
0	0	0	40	1	0	0	0	179.62	6.5	121	33.6184	0	4	1.2	8.96	24.9969
0	0	1	55	0	1	1	0	94.86	2.92857	104.5	24.4053	0	0.4	1.8	0.97	136.581
0	0	0	35	1	0	1	1	146.64	10.8	118.5	27.2242	1	1.3	1.2	4.56	89.4219
0	0	1	40	0	0	0	0	98.2648	3.4	115	23.55	0	1.1	1.2	0.48	57.1235
0	0	1	35	0	0	0	1	155.17	3.69231	132.5	24.3961	0	1.6	1.2	0.88	30.3227
0	1	0	45	1	0	1	0	93.08	4.66667	111.5	23.5138	0	0.8	1.2	0.44	37.796
0	0	0	50	0	0	1	0	101.468	4.07692	142	26.5655	0	4.9	1.2	4.38	20.9596
0	0	1	50	0	0	1	1	82.8161	3	128	26.1623	0	11.7	2	0.18	48.963
0	0	0	60	1	0	0	0	64.9392	4.08333	138.5	23.1571	0	3.9	1.2	0.69	177.813
0	0	0	30	0	0	0	0	159.714	4.72727	114	32.4895	0	0.6	1.2	2	46.9014
0	0	0	45	0	0	0	0	70.3576	2.27778	108.5	19.3626	0	0.1	1.2	0.44	102.822
0	0	0	30	1	0	0	0	130.632	4.08333	129.5	31.4941	0	0.7	1.2	0.11	18.9839
0	0	0	45	1	0	0	0	94.3667	3.78571	103.5	28.8845	0	0.1	1.2	1.44	38.9986
0	0	0	50	0	0	0	0	129.966	2.94444	141	29.1363	0	1.4	3.8	13.76	220.505
0	0	0	45	0	0	0	0	163.104	3.25	129.5	34.966	0	5.1	1.2	1.68	67.2597
0	0	0	45	0	0	0	0	149.052	3.61538	116	31.5631	0	8.2	1.2	6.62	54.2029
0	1	1	50	0	0	1	0	107.093	7	141	26.3978	0	12.1	2.3	0.43	27.488
0	0	1	55	0	0	1	0	154.788	4.16667	151.5	33.309	0	49.8	3	1.12	27.4021
0	0	1	45	0	0	0	0	127.895	4	145	24.1215	0	0.4	2.9	0.49	22.8494
0	0	0	30	1	0	0	0	180.457	4.36364	111.5	35.1939	0	0.1	9	1.2	71.1252
0	0	0	45	0	0	0	0	65.9886	3.06667	120.5	20.5888	0	0	1.2	0.19	69.4931
0	0	1	50	1	0	0	1	137.064	5.3	152.5	31.8448	0	12.3	6.6	1.89	17.6095
0	0	0	45	0	0	0	0	84.9385	2.04	113.5	21.8399	1	0	1.2	0.48	68.72
0	0	1	45	0	0	1	0	116.378	5.125	146.5	29.9972	0	8.4	1.4	0.64	33.7587
0	0	1	45	0	0	0	0	115.899	2.72222	131.5	25.9224	0	6.3	2.4	1.18	16.0633
0	0	0	30	1	0	0	0	176.993	4.07692	147.5	35.7298	0	26.4	1.2	11.14	177.899
0	0	1	35	0	0	0	0	143.129	6.5	141.5	27.3756	0	42.3	1.4	2.86	19.4993
0	0	0	45	1	0	1	1	65.2637	4.61538	105	18.2746	0	18.3	1.2	4.32	44.1526
0	0	1	50	0	0	0	1	112.281	3.5	141.5	28.6326	0	3.1	2.9	4.26	6.11608
0	0	0	40	1	0	0	0	116.96	3.4	123.5	24.9991	0	0.7	1.9	0.77	30.4086
0	0	0	55	1	0	1	0	126.184	6.08333	107.5	31.023	0	27.6	1.9	2.77	46.4719
0	0	0	65	0	0	1	0	79.664	2.64706	127.5	25.7425	0	3	2	0.69	115.278
0	0	1	50	0	1	1	0	138.575	6.66667	135.5	34.4759	0	21.3	1.5	0.27	65.4558
0	0	1	65	0	1	1	1	130.364	3.88889	136.5	32.3525	0	26.6	2.6	1.14	115.793
0	0	0	35	1	0	0	0	148.091	6.22222	113.5	30.7307	0	2.5	1.2	2.62	80.0588
0	0	1	60	0	0	0	1	93.0114	3.5	160	28.9534	0	44.8	1.2	1.16	21.0455
0	0	1	65	0	1	1	0	85.3825	3.06667	123.5	24.9829	0	1.4	3.4	0.44	31.4394
0	0	0	60	0	0	1	1	85.3823	2.89474	163.5	20.8679	0	4.6	2.8	0.74	198.257
0	0	1	30	0	0	0	0	182.377	4.55556	141	28.5961	0	5.8	1.2	0.8	53.1721
0	0	0	55	0	0	0	0	127.525	5.63636	151.5	31.6844	0	8.6	2.3	1	54.7183
0	0	1	60	0	0	1	0	106.409	6.4	145.5	31.2539	0	1.9	12.3	6.18	13.744
0	0	1	60	1	1	1	0	78.9462	2.875	137.5	24.1522	0	2	1.2	0.98	82.6358
0	0	1	45	0	0	1	1	145.967	3.92857	145	23.3108	0	6.1	1.3	5.6	84.8692
0	0	0	45	1	0	0	0	112.367	4.23077	113	26.6482	0	7.8	1.2	0.72	98.2696
0	0	0	30	1	0	0	0	297.44	3.81818	127	50.7265	0	3.2	1.2	16.48	125.586
0	0	1	40	1	0	0	0	120.341	6.69231	138	26.6902	0	13.2	1.4	2.25	5.07863
0	0	0	60		0	0	0	128.128	4.92857	117.5	30.6635	0	20.1	1.3	1.43	118.37
0	0	1	45	0	0	0	0	171	7.22222	135	36.6289	0	89.4	1.8	5.16	10.1362
0	0	0	30	1	0	0	0	307.284	5.72727	139.5	36.5769	0	3.7	1.2	2.56	33.9305
0	0	1	30	0	0	0	0	113.596	5.75	127.5	27.3716	0	19.6	2.9	0.16	28.5188
0	0	1	60	0	1	1	0	114.899	4.45455	129	37.2345	0	35.8	1.2	4.73	472.45
0	0	1	40	0	0	1	0	123.677	7.09091	137	30.8452	0	2.9	2.2	3.03	57.1235
0	0	0	65	0	0	1	0	161.965	3.83333	177	36.5575	0	26.1	4.3	0.69	127.647
0	0	0	45	1	0	0	0	136.879	4.28571	159	26.571	0	5	1.2	2.07	99.9017
0	0	1	40	0	0	0	0	112.252	4.72727	116	25.1053	0	0	1.7	0.36	48.7912
0	0	1	35	1	0	0	0	165.717	4.81818	131.5	27.6946	0	5.5	1.2	0.48	17.8672
0	0	0	55	0	0	0	1	110.438	3.61111	163	34.2194	0	4.6	1.4	0.38	27.6598
0	0	1	35	0	0	0	0	147.296	2.94444	143.5	26.9044	0	10.5	1.2	0.77	28.2611
0	0	1	50	0	0	0	0	121.06	4.33333	124.5	25.6389	0	1.8	4	3.91	109.437
0	0	1	55	1	0	0	0	170.708	6.2	131.5	28.0606	0	50.2	1.7	1.21	50.7669
0	0	1	65	0	0	1	1	96.3961	3.16667	149	29.618	0	22.2	2	1.07	21.5609
0	0	0	55	0	0	0	0	109.416	4.94444	146	24.2422	0	9.8	1.8	0.77	41.0602
0	0	1	60	0	0	0	0	65.4453	2.94118	133.5	23.6925	0	9.8	1.2	0.28	32.1266
0	0	0	60	0	0	0	0	99.726	3.17647	159.5	30.6362	0	20.5	4.6	0.73	34.4459
0	0	0	60	1	0	1	0	102.613	4.26316	133	29.6427	0	22.4	3.8	0.66	292.575
0	0	0	45	0	0	0	0	143.375	3.4375	123	26.0065	0	0.8	1.2	0.23	26.8867
0	0	0	55	1	0	0	0	107.737	5.63636	114.5	31.369	0	8.6	1.2	6.34	77.9972
0	0	0	50	0	0	0	0	113.04	4.57143	150	30.1344	0	0.3	1.2	5.45	63.1365
0	0	1	50	1	0	0	0	135.643	3.625	133	30.2113	0	13.8	1.2	1.31	37.1088
0	0	0	40	1	0	0	0	127.59	6.6	146.5	36.7284	0	25.2	1.2	7.24	41.0602
0	0	1	40	0	0	0	0	100.473	4.41667	148	25.8197	0	1.3	2	1.63	16.8364
0	0	1	50	0	0	0	0	96.924	3.15789	154	24.9266	0	1	1.2	0.45	19.3275
0	0	1	30	1	0	0	0	172.93	4.25	135	27.9091	0	10.2	3.2	3.97	42.6923
0	0	1	45	0	0	1	1	125.217	2.66667	124	26.2912	0	59.8	2.3	2.36	32.3843
0	0	0	50	1	0	0	0	73.3824	5.33333	125	22.9975	0	2.4	1.2	2.56	96.8093
0	0	1	30	1	0	0	0	178.267	5.07143	140	28.9556	0	0.2	1.3	1.19	17.6954
0	0	1	30	0	0	0	0	125.235	3.3125	114.5	23.8213	0	0.1	1.6	0.35	32.7279
0	0	1	50	0	0	0	0	130.626	6.5	138	30.7191	0	48.7	1.9	0.55	7.41317
0	0	1	65	0	0	0	0	77.1644	2.89474	136	21.8958	0	1.5	1.5	6.49	56.3504
0	0	0	60	1	0	0	0	53.923	2.8	127.5	28.3387	0	4.5	2.2	0.14	171.199
0	0	0	65	1	0	1	0	62.0164	5.18182	138.5	38.1286	0	11.8	3.3	7.77	584.979
0	0	1	65	0	0	1	0	66.5579	6.36364	160.5	26.3089	0	17.7	2.5	1.01	56.0927
0	0	0	65	0	0	0	0	69.0696	3.19048	156	22.7726	0	0	1.2	0.45	76.0215
0	0	0	40	1	0	0	0	71.8043	2.57143	100	23.7807	0	0.2	1.2	0.18	42.6923
0	0	1	65	1	0	1	0	72.0295	4	158.5	26.5285	0	5.5	2.1	2.19	29.8932
0	0	0	45	1	0	0	0	72.0973	4	128.5	19.907	0	1.3	2.9	0.51	57.6389
0	0	0	65	0	0	0	0	77.8901	4.78571	165	29.6255	0	37.2	2	0.51	46.6437
0	0	0	55	0	0	0	0	81.1561	2.875	163.5	24.6061	0	4.1	2.2	0.72	75.5061
0	0	1	45	0	0	0	0	81.668	5.33333	143.5	22.9182	0	3.2	1.9	0.49	11.9401
0	0	0	65	0	0	0	0	81.8	4.76923	135.5	30.2656	0	8.1	2	3.54	239.919
0	0	0	65	0	0	0	0	82.2	3.61538	141	25.8453	0	9.9	1.2	0.5	167.591
0	0	1	60	1	1	1	0	84.0587	6.5	127.5	27.3015	0	8.2	3.1	0.62	26.8867
0	0	0	55	0	0	0	0	84.24	3.45	127.5	23.9175	0	0.4	1.2	0.35	67.002
0	0	0	60	1	0	0	0	85.7383	4.28571	125.5	26.5248	0	12.2	3.6	1.29	61.3326
0	0	0	60	0	0	1	0	85.8	4.5	166.5	24.9941	0	2.6	1.8	0.3	170.941
0	0	0	45	0	0	0	0	86.0971	2.63158	136.5	21.9917	0	10.5	1.2	0.22	35.7344
0	0	1	50	0	0	1	0	87.8491	6.125	134.5	25.7449	0	32.2	4.5	1.26	43.1218
0	0	0	60	0	0	0	0	88.6206	4.06667	101.5	24.8487	0	12.4	1.7	0.82	77.9113
0	0	0	60	1	0	1	0	92.7618	4.71429	120	27.7398	0	1.1	1.6	2.33	155.737
0	0	1	50	0	0	0	0	93.4912	6.2	136.5	30.1621	0	4.8	2.3	1.46	7.34445
0	0	0	35	1	0	0	0	93.6752	3.05882	117	22.5479	0	0.2	1.2	0.24	76.6228
0	0	1	55	0	0	0	0	93.9705	4.5	110.5	24.0447	0	17.8	2.8	0.13	44.3244
0	0	0	40	0	0	0	0	94.7093	2.19048	103.5	21.875	0	0	1.6	0.51	32.1266
0	0	0	55	1	0	0	0	95.7026	4.26667	134	26.4039	0	2.8	1.2	3.56	72.9291
0	0	0	50	0	0	0	0	96.549	3.375	138.5	27.9626	0	13.9	1.2	2.87	47.7604
0	0	0	35	1	0	0	0	97.344	2.5	103.5	20.8493	0	4.2	1.2	3.36	148.006
0	0	1	55	1	0	0	0	97.4929	3.38462	120.5	25.662	0	6.7	2.3	0.66	244.987
0	0	1	65	0	0	1	0	97.7351	5.61538	130	26.256	0	51.8	4	1.14	13.3145
0	0	1	50	1	0	0	0	98.3428	5	156	25.2635	0	1.7	3.5	1.89	63.0506
0	0	0	50	1	0	0	0	98.4414	5.5	110.5	22.5423	0	0.3	1.2	0.8	54.7183
0	0	0	55	0	0	0	0	98.8186	3.76471	129.5	22.8548	0	11.4	1.2	0.4	108.406
0	0	1	50	0	0	0	0	98.9158	5.53846	122	28.5859	0	74.8	19.8	4.6	57.6389
0	0	0	55	0	0	1	0	99.2191	3.35714	138	27.9595	0	5.9	1.2	0.83	84.6974
0	0	0	45	0	0	0	0	99.6136	4.91667	112.5	28.112	0	0.2	1.2	4.53	205.387
0	0	0	60	0	0	1	1	99.84	3.9375	143	25.7614	0	7.8	1.2	0.97	77.4818
0	0	1	60	0	0	0	0	100.397	2.93333	141	24.3026	0	3.2	2.6	1.73	104.626
0	0	0	45	1	1	0	0	100.494	2.42105	131.5	24.6077	0	4.6	1.2	0.48	99.5581
0	0	0	50	0	0	1	0	102.037	2.93333	140	25.9211	0	0.3	1.2	2.17	47.6745
0	0	1	30	0	0	0	0	102.441	3.75	126.5	22.6012	0	1.6	1.2	1.12	18.9839
0	0	0	50	0	0	0	1	102.685	3.625	134.5	30.8913	0	19.9	1.4	4.33	105.829
0	0	1	35	0	0	0	0	102.733	3.125	147	23.7166	0	4.4	1.6	0.31	5.07863
0	0	1	45	0	1	1	0	102.747	2.42105	134	24.9511	0	10.3	2.2	0.17	54.2029
0	1	1	40	1	0	0	0	102.9	4	121.5	22.477	0	1.7	1.2	0.27	34.1882
0	0	0	40	1	0	0	0	102.945	3.07143	127	22.8735	0	0.1	1.2	2.85	113.56
0	0	1	60	1	0	0	0	103.179	3.73333	128	21.1708	0	61.5	2.2	2.05	293.434
0	0	0	30	0	0	0	0	103.532	4	102.5	21.3709	0	0	2.9	0.54	47.1591
0	0	0	40	0	0	0	0	103.847	4.30769	103	23.4396	0	0.6	1.2	0.5	39.5999
0	0	0	35	0	0	0	0	104.567	4.30769	113	23.0182	0	0.4	6.7	0.54	12.9709
0	0	1	55	0	0	0	0	104.822	50	135	25.122	0	41.8	4.3	1.9	38.5691
0	0	1	55	0	0	1	1	105.382	5	146	30.1229	0	6.4	5.5	2.28	44.1526
0	0	0	55	0	0	0	0	106.787	4.78571	143	29.7876	0	8.5	1.2	0.99	60.3877
0	0	0	65	0	0	0	0	106.971	3.58824	138.5	26.3878	0	16.8	13.5	0.02	38.0537
0	0	0	35	1	0	0	0	107.532	4.72727	114.5	26.5223	0	0	1.2	1.11	50.1656
0	0	1	35	0	0	0	0	107.726	3.82353	112	22.5543	0	0	1.6	0.42	16.1492
0	0	0	40	1	0	0	0	108.262	4.09091	111.5	23.044	0	0.5	1.2	0.5	69.3213
0	0	0	30	1	0	0	0	108.609	3.45454	111.5	24.3256	0	0.9	1.2	0.55	104.454
0	0	0	40	1	0	0	0	109.2	4.4375	130.5	21.6765	0	5.7	1.2	12.79	157.97
0	0	0	45	1	0	1	0	109.297	3.8	127.5	24.4695	0	0.9	1.2	1.09	31.6971
0	0	0	50	0	0	0	0	109.336	5.83333	133.5	28.5573	0	25.2	1.2	2.06	37.4524
0	0	1	60	0	0	0	0	109.519	6.5	141	34.5435	0	44.2	2.3	1.11	43.7231
0	0	1	55	0	0	0	0	110.1	3	126	27.0435	0	2.6	1.2	0.31	28.0893
0	0	1	30	0	0	0	0	110.255	3.5	116.5	22.7735	0	1.6	1.2	0.42	5.07863
0	0	1	45	0	0	1	0	110.302	5.75	137.5	32.8767		8.4	3.6	0.86	33.0715
0	0	0	50	0	0	0	0	110.357	4.46667	130.5	26.2111	0	20.8	1.4	3.65	65.7135
0	0	0	45	1	0	0	0	111.524	7.5	111.5	26.906	0	12	1.2	2.45	94.7477
0	0	1	50	0	0	0	0	111.718	5.45455	147.5	25.7651	0	64.3	1.5	0.68	34.36
0	0	1	55	1	0	0	0	111.778	3.8125	131.5	26.3174	0	28.5	1.2	0.9	22.4199
0	0	0	40	0	0	0	0	111.836	5.3	167.5	29.7644	0	0.4	1.6	2.26	61.4185
0	0	1	35	0	0	0	0	112.021	5.76923	143.5	26.571	0	5.8	1.2	0.57	14.4312
0	0	1	50	0	0	0	0	112.05	4.66667	130	26.6132	0	4.8	1.8	0.42	30.924
0	0	0	30	0	0	0	0	112.221	2.72222	112.5	21.4851	0	0.2	1.4	2.21	64.1673
0	0	0	55	1	0	1	0	112.84	4.25	128	26.8192	0	5	1.8	0.76	63.2224
0	0	1	50	0	0	0	0	112.89	4.54545	159.5	31.5883	0	2.1	2.5	0.73	28.2611
0	0	1	35	0	0	0	0	113.113	3.63636	116	25.2966	0	0.3	1.4	0.34	15.9774
0	0	0	40	0	0	0	0	113.145	4.4	121	23.3183	0	1.2	1.2	0.22	251.687
0	0	0	55	0	0	1	0	113.471	2.45454	124.5	28.5868	0	20.4	1.2	4.83	39.5999
0	0	1	45	0	0	0	0	113.699	8.25	125.5	30.9404	0	20.8	2.3	2.94	11.9401
0	0	1	40	1	0	0	0	114.15	4.76923	136.5	22.6496	0	2.5	1.2	0.69	43.6372
0	0	1	55	0	0	0	1	114.455	5.625	129.5	26.2298	0	2.4	1.4	4.46	63.4801
0	0	1	35	1	0	0	0	115.076	5.36364	124	20.7985	0	4.8	1.2	0.63	7.12111
0	0	0	30	0	0	1	0	115.098	3.75	96.5	29.0572	0	0.7	1.4	1.39	55.4914
0	0	1	40	1	0	0	0	115.407	2.64706	104	22.9693	0	0.4	1.4	1.07	41.7474
0	0	1	40	0	0	0	0	115.925	7.33333	152	31.1176	0	12.2	1.3	5.13	12.2837
0	0	0	35	0	0	0	0	116.774	3.1875	109.5	24.4711	0	0.4	1.2	0.48	71.1252
0	0	1	40	0	0	0	0	116.779	4	127.5	27.7267	0	7.8	3.8	1.58	29.206
0	0	1	45	0	0	0	0	117.49	3.92857	136.5	24.8107	0	1.6	1.2	5.79	23.3648
0	0	0	50	1	0	0	0	118.106	3.3125	111	25.8661	0	1.1	1.2	0.39	76.1074
0	0	0	55	0	0	1	1	118.432	4	147	39.2758	1	53.2	1.2	6.91	54.8042
0	0	0	50	0	0	1	0	118.44	3.5	135	26.4248	0	3	1.2	1.15	33.5869
0	0	0	50	0	0	0	0	120.004	3.84211	120	28.635	0	0.6	1.2	4.73	24.9969
0	0	0	50	0	0	0	0	120.304	3.76471	140	28.2154	0	8.9	1.2	0.53	131.513
0	0	1	35	0	0	0	0	120.351	5.2	129.5	27.2829	0	11.4	1.2	0.78	10.7375
0	0	0	35	1	0	0	0	121.049	2.52632	110.5	20.1746	0	0	1.2	0.58	13.5722
0	0	1	60	0	0	1	0	121.138	5.61538	134	29.2435	1	20.2	1.5	0.17	27.1444
0	0	0	60	0	0	0	0	121.346	2.94737	140.5	30.7307	0	5.1	1.2	3.28	57.8966
0	0	0	50	0	0	0	0	121.68	4.25	115.5	25.5057	0	5	4.2	0.39	17.0941
0	0	1	35	1	0	0	0	122.009	3.92308	147.5	26.2804	0	0.3	3.7	1.07	12.9709
0	0	1	50	0	0	1	0	122.651	6.875	123.5	29.4349	0	2.4	1.2	1.76	29.1201
0	0	0	45	1	0	1	0	123.721	3.35294	119	28.0006	0	4.4	1.2	1.66	34.7895
0	0	1	30	0	0	0	0	124.56	8.125	167.5	31.6021	0	5.2	1.7	4.21	8.9336
0	0	1	40	1	0	0	0	126.075	8.33333	141	26.9601	0	15.7	2.3	1.91	5.63504
0	0	0	40	0	0	0	0	126.667	2.78947	113.5	31.7785	0	10	1.2	1.62	46.5578
0	0	0	35	1	0	0	0	127.017	5.875	111	31.1353	0	0.5	1.2	1.98	27.2303
0	0	1	35	0	0	0	0	127.206	7.22222	130	32.9628	0	6.5	1.2	1.93	32.3843
0	0	1	35	0	0	0	0	128.111	7.22222	100	25.5458	0	1.8	1.2	16.01	120.861
0	0	1	50	0	0	0	0	128.113	7.3	164.5	30.9251	0	30.8	2.1	0.4	14.0017
0	0	1	30	0	0	1	0	128.605	4	142.5	27.5615	0	3.6	5.7	2.82	18.3826
0	0	1	40	0	0	0	0	128.922	5.83333	144	24.1493	0	3.4	1.5	1.14	5.07863
0	0	1	60	0	0	1	1	130.503	3.06667	126	30.1153	0	37.1	1.3	0.13	30.3227
0	0	0	35	0	0	0	0	132.552	4.28571	122.5	28.055	0	0.3	1.2	1.54	45.3552
0	0	0	35	0	0	0	0	132.912	4.6	113.5	28.7994	0	0	1.2	0.38	17.6095
0	0	1	30	0	0	0	0	133.766	5	150	31.4219	0	11	1.2	1.74	35.8203
0	0	0	45	0	0	0	0	134.507	3.4375	111.5	26.978	0	7.1	1.2	2.54	53.6875
0	0	1	60	0	0	0	1	134.723	5.28571	136	35.1202	0	33.9	3	1.79	40.8025
0	0	1	35	1	0	0	0	135.1	6.45455	139	27.7395	0	1.2	2	4.25	29.0342
0	0	0	55	0	0	1	0	135.252	4	134	27.6949	0	51.2	1.2	10.01	23.7084
0	0	0	55	0	0	1	1	136.136	2.92857	151	29.2945	0	5.6	1.2	0.21	65.6276
0	0	1	40	1	0	0	0	136.376	7.4	129.5	27.407	0	3.6	1.4	1.51	18.5544
0	0	0	40	0	0	0	0	136.377	3.23529	101.5	24.8013	0	12.2	2	0.37	67.002
0	0	1	35	0	0	0	0	136.868	3.66667	136.5	26.2636	0	2.1	1.2	1.19	18.5544
0	0	0	30	0	0	0	0	136.944	5	147.5	30.6372	0	0.1	1.2	1.53	54.3747
0	0	0	45	0	0	0	0	137.085	2.82609	118	24.942	0	0.4	1.2	0.5	30.3227
0	0	1	40	0	0	0	0	137.947	5.88889	135.5	26.2838	0	2	1.2	1.93	30.4086
0	0	0	30	0	0	0	0	138.336	3.53846	126	25.4612	0	0.1	1.2	0.24	5.07863
0	0	1	50	0	0	0	0	139.482	7.125	170.5	32.9519	0	26.9	2	5.52	32.2984
0	0	1	55	0	0	1	0	141.673	4.81818	131.5	28.858	0	3.6	1.7	5.64	13.9158
0	0	0	30	1	0	0	0	141.856	2.92308	116	32.1799	0	0.3	1.2	1.75	157.283
0	0	1	50	0	0	0	0	142.494	5.625	138.5	32.3098	0	7.5	2.5	4.76	31.783
0	0	1	40	1	0	0	0	142.921	6.63636	135	32.3437	0	6.8	1.2	0.61	20.9596
0	0	0	35		0	0	0	143.35	3.69231	118.5	25.6115	0	1.3	1.2	0.17	104.884
0	0	1	45	1	0	1	1	143.93	5.44444	141.5	26.6003	0	19.1	1.2	4.69	13.6581
0	0	1	35	0	0	0	0	144.27	5.55556	118	27.0558	0	0.6	1.2	0.16	25.8559
0	0	1	30	0	0	0	0	144.418	3.61538	138.5	30.7168	0	0.6	1.2	0.81	5.11926
0	0	1	55	0	0	0	0	144.659	3.58824	165	24.6233	0	8.9	1.5	0.35	51.1105
0	0	1	35	0	0	0	0	145.488	5.44444	118	27.9502	0	21.6	1.4	1.49	12.5414
0	0	1	40	1	0	0	0	147.6	4.90909	144	25.4368	0	8	1.9	1.58	69.7508
0	0	0	45	1	0	0	0	148.67	5.5	122.5	26.9277	0	7.7	1.2	0.68	73.6163
0	0	1	45	0	0	1	0	151.397	6.77778	131.5	29.3594	0	0.6	1.2	0.97	24.4815
0	0	0	40	0	0	0	0	153.164	3.86667	137	30.7502	0	3.4	1.2	0.84	37.0229
0	0	1	30	1	0	0	0	154.964	7.55556	130	27.9212	0	2.2	1.3	1.42	29.3778
0	0	1	30	1	0	0	0	156.382	5.08333	125	32.6809	0	20.6	1.2	0.5	23.0212
0	0	0	30	0	0	1	0	157.596	3.4	125.5	26.9765	0	0.7	1.4	10.32	102.908
0	0	0	40	0	0	0	0	159.349	5	117	30.345	1	0.7	1.2	4.98	59.1851
0	0	1	40	0	0	0	0	159.481	6.77778	126	30.0682	0	29	11	1.96	25.9418
0	0	1	65	0	0	0	0	159.499	4.35714	164	34.3359	0	16.9	4	1.89	21.7327
0	0	0	50	0	0	0	1	159.971	3.07692	152	30.7429	0	18.5	1.2	1.04	24.4815
0	0	1	45	0	0	0	0	160.336	3.29412	126	33.7185	0	14.8	2	0.81	31.5253
0	0	1	50	0	0	1	0	161.007	6.22222	122.5	41.9244	0	15.5	5.6	4.63	71.6406
0	0	0	35	0	0	0	0	161.417	4.90909	123	30.154	1	0.7	1.2	2.37	25.2546
0	0	1	40	1	0	0	0	161.868	4.58333	124.5	28.6524	0	4.9	1.2	1.56	18.1249
0	0	0	45	0	0	1	0	161.972	6.1	147	35.5741	0	2.5	1.5	4.45	98.8709
0	0	1	30	0	0	0	0	163.515	6.3	144	32.0653	0	4.9	1.2	1.33	31.6112
0	0	1	30	1	0	0	0	164.909	3.84615	128	26.9659	0	5.6	1.2	0.55	12.1119
0	0	0	40	0	0	0	0	165.394	3.91667	126.5	36.2167	0	1.1	1.2	1.2	29.6355
0	0	1	60	0	0	0	0	167.608	6	128	32.256	0	57.1	2.9	1.58	28.4329
0	0	0	30	0	0	0	0	167.715	4.27273	104.5	27.3991	0	3.3	1.2	3.65	27.488
0	0	1	40	1	1	1	0	167.727	3.53846	111.5	31.8038	0	5.6	3.9	0.47	80.4024
0	0	1	35	0	0	0	0	171.303	4.36364	137.5	30.1414	0	6.5	1.2	0.27	5.07669
0	0	1	35	1	0	0	0	171.314	3.8125	133	26.7003	0	2.2	2.6	0.55	43.4654
0	0	1	35	1	0	0	0	171.386	8.5	127.5	31.5942	0	0.4	1.2	1.51	32.2125
0	0	1	40	0	0	0	0	171.876	4.41667	123	31.4365	0	61.4	1.2	4.09	11.8542
0	0	1	45	1	0	0	1	176.291	5.875	126.5	36.2764	0	2.3	4.4	4.37	9.9644
0	0	1	30	0	0	0	0	177.848	5.09091	117	31.0053	0	4.4	1.2	1.23	33.5869
0	0	1	35	1	0	0	0	178.92	9.42857	138	31.5013	0	16.8	1.4	1.65	10.9952
0	0	0	35	0	0	0	0	179.599	4.46154	122.5	28.5312	0	0.5	1.2	4.2	96.208
0	0	1	30	0	0	0	0	182.391	4.16667	140	30.3287	0	3.9	1.2	0.21	5.07863
0	0	1	30	0	0	0	0	183.219	5.5	139	32.5771	0	7.2	1.5	6.77	34.1023
0	0	0	35	0	0	0	0	184.813	2.63158	109	35.4134	0	4.1	1.2	0.98	18.1249
0	0	1	40	0	0	0	0	185.358	4.15385	149.5	35.8625	0	21.2	1.8	2.12	38.655
0	0	1	40	0	0	1	1	186.304	5.36364	122.5	32.5207	0	56.2	1.2	4.79	5.11926
0	0	0	35	0	0	0	0	191.94	4.58333	138	33.7765	0	0.2	1.2	84.88	15.462
0	0	0	35	1	0	0	0	192.629	3.42857	143.5	31.3245	0	2.4	1.2	3.23	81.6909
0	0	0	40	0	0	1	0	195.357	4.6	172.5	32.9547	0	19.3	1.2	19.29	72.3278
0	0	1	35	0	0	0	0	197.699	5	113	30.3379	0	3.9	1.2	1.38	6.99226
0	0	1	45		0	1	1	201.956	5.81818	143.5	31.514		9.2	1.4	4.38	5.57491
0	0	0	30	1	0	0	0	204.716	7.2	114.5	37.4656	0	1.3	1.2	3.22	29.5496
0	0	0	35	0	0	0	0	204.899	5.11111	112.5	37.6776	0	0.3	1.2	13.43	43.7231
0	0	1	30	0	0	0	0	209.038	7.33333	148	30.513	0	1.7	1.7	0.28	25.1687
0	0	1	45	0	0	0	0	211.914	5.5	128.5	33.2089	0	23.3	1.2	0.74	37.0229
0	0	1	40	0	0	0	0	247.559	5.30769	155.5	45.4072	0	67.1	3.3	4	10.8234
0	0	1	40	1	0	0	0	255.88	5	148	38.95	0	55.9	1.5	3.67	84.5256
